# Supplementary material
Source: publisher figshare collection journal article supplement (https://sage.figshare.com/ndownloader/files/13644275)
Supplement: Supplementary file 1 [file 13644275]

## Supplementary File 5: Contents of manual accompanying the electronic data extraction instrument

| Section | Content                                                                                                                                                                                                                                                                                                                                                                                                                                                                                                                                                                                                                                                                                                                                            |
|---------|----------------------------------------------------------------------------------------------------------------------------------------------------------------------------------------------------------------------------------------------------------------------------------------------------------------------------------------------------------------------------------------------------------------------------------------------------------------------------------------------------------------------------------------------------------------------------------------------------------------------------------------------------------------------------------------------------------------------------------------------------|
| 1       | Definitions of BTP and CBP                                                                                                                                                                                                                                                                                                                                                                                                                                                                                                                                                                                                                                                                                                                         |
| 2       | A summary of the dataset and explanation where to find the required data (narrative notes were available in the form of a rolling Word document, with entries added in ascending date order)                                                                                                                                                                                                                                                                                                                                                                                                                                                                                                                                                       |
| 3       | <p>An overview of the data extraction process and step-by-step instructions how to complete the required fields</p> <ul style="list-style-type: none"><li>(a) Raters were instructed to read through each entry in this order to identify episodes of pain (although the manual also stated that raters may wish to review the entirety of the notes to gain a fuller picture).</li><li>(b) Raters completed a section on patient characteristics</li><li>(c) Raters extracted information about episodes of pain following three steps:<ul style="list-style-type: none"><li>(i) Identification of pain episodes;</li><li>(ii) Selection of episodes with evidence of CBP;</li><li>(iii) Confirmation of the presence of BTP;</li></ul></li></ul> |
| 4       | A codebook providing details on each of the variables.                                                                                                                                                                                                                                                                                                                                                                                                                                                                                                                                                                                                                                                                                             |
